# Supplementary material for: Burden of Pediatric SARS-CoV-2 Hospitalizations during the Omicron Wave in Germany
Source: MDPI journal article supplement (doi:10.3390/v14102102), 2022-09-22
Supplement: s1 [file s1]

Supplemental Table S1. Average number of reporting hospitals and SARS-CoV-2 cases from January 24, 2022 - July 31, 2022.

|                                                | January | February | March | April | May | June | July |
|------------------------------------------------|---------|----------|-------|-------|-----|------|------|
| Number of reporting pediatric hospitals        | 76      | 66       | 53    | 38    | 31  | 28   | 25   |
| % of reporting pediatric hospitals in Germany* | 22.8    | 19.8     | 15.9  | 11.4  | 9.3 | 8.4  | 7.5  |
| Number of patients on general wards            | 164     | 153      | 127   | 64    | 28  | 31   | 43   |
| Number of patients on intensive care units     | 13      | 13       | 8     | 5     | 2   | 3    | 3    |
| Total number of patients hospitalized          | 177     | 166      | 135   | 69    | 30  | 34   | 46   |

\*The total number of German pediatric hospitals used as a basis for calculating percentages was 334.

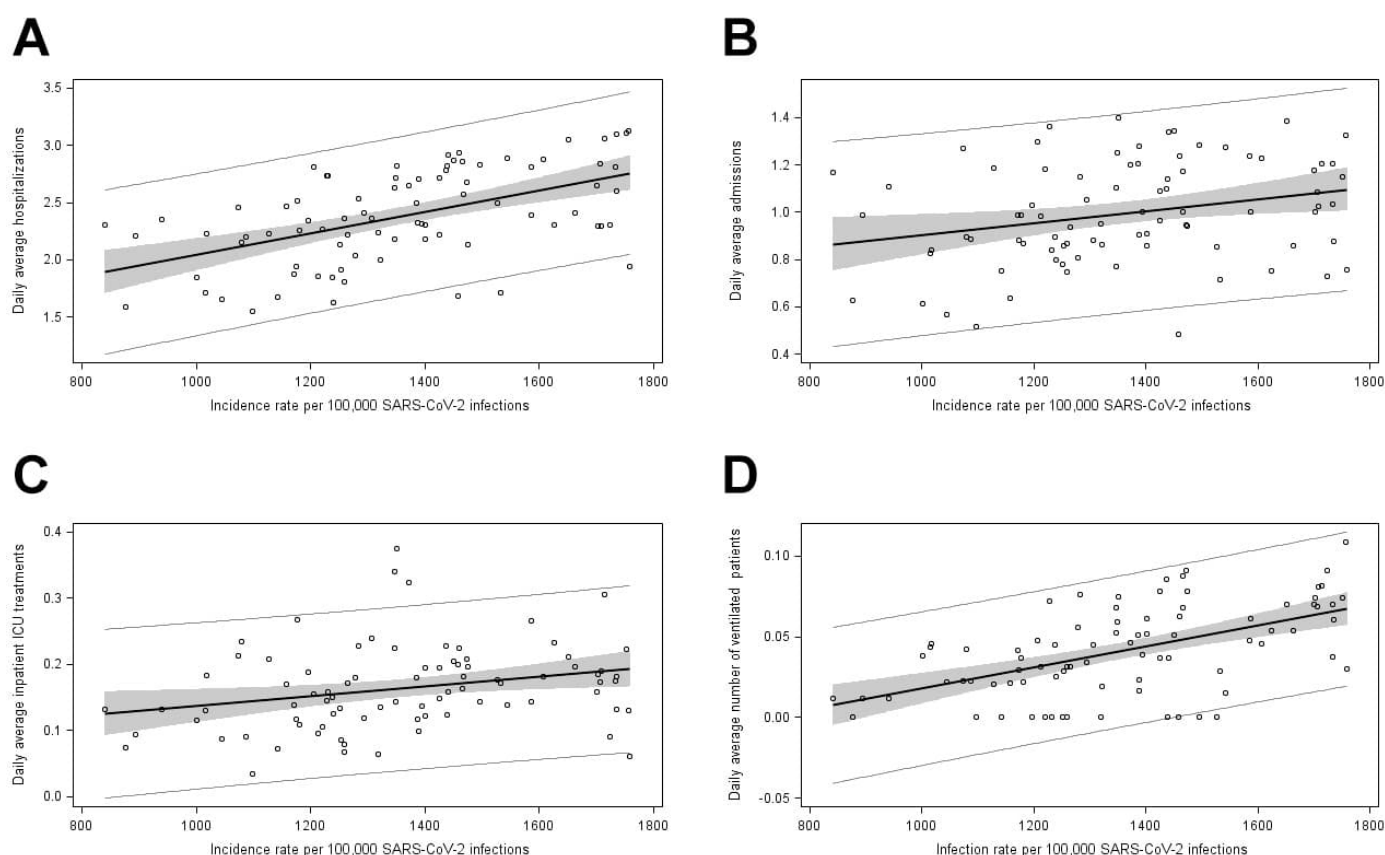

Supplemental Figure S1. Association of SARS-CoV-2 incidence rates and A) average hospitalizations per reporting hospital per day, B) average admissions per reporting hospital per day, C) average number of inpatient intensive care treatments per reporting hospital per day and D) average number of ventilated patients per reporting hospital per day.
